# Supplementary material
Source: PubMed Central journal article supplement (PMC3295251)
Supplement: 1116188109_pnas.201116188SI.pdf [file 1116188109_pnas.201116188SI.pdf]

# Supporting Information

Omori et al. 10.1073/pnas.1116188109

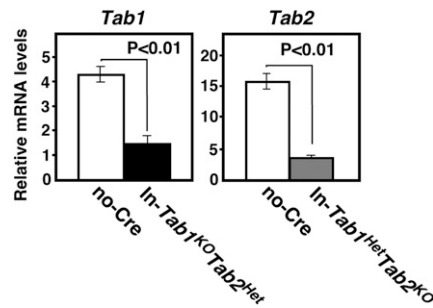

**Fig. S1.** *Tab1* and *Tab2* mRNAs were reduced in the *Tab1<sup>KO</sup>Tab2<sup>Het</sup>* and *Tab1<sup>Het</sup>Tab2<sup>KO</sup>* intestine. Real-time PCR analysis quantified mRNA levels in control (open bars) and intestinal epithelial-specific *Tab1* or *Tab2* knockout (solid and shaded bars) small intestines at P0. Relative mRNA levels of *Tab1* and *Tab2* were calculated using *Gapdh* mRNA. Data show the means  $\pm$  SE of no-Cre,  $n = 12$ ; In-*Tab1<sup>KO</sup>Tab2<sup>Het</sup>*,  $n = 4$ ; and In-*Tab1<sup>Het</sup>Tab2<sup>KO</sup>*,  $n = 7$ .

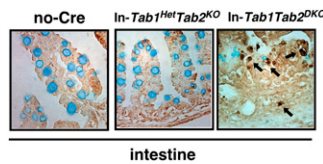

**Fig. S2.** Intestinal epithelial cells including goblet cells underwent apoptosis in *Tab1* and *Tab2* double-deficient intestinal epithelium. Sections of the small intestine from no-Cre, In-*Tab1<sup>Het</sup>Tab2<sup>KO</sup>*, and In-*Tab1Tab2<sup>DKO</sup>* at P0 were double stained with TUNEL (brown) and Alcian Blue (blue). Arrows indicate examples of TUNEL-positive cells.

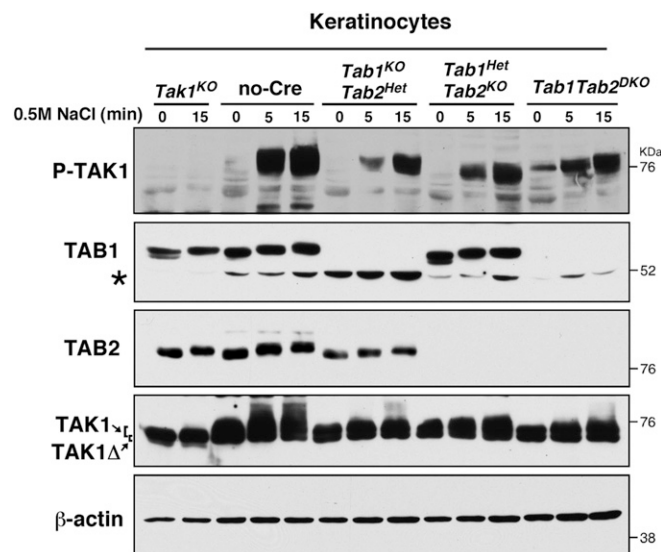

**Fig. S3.** TAB1 is not solely responsible for osmotic stress-induced TAK1 activation in keratinocytes. *Tak1<sup>KO</sup>*, no-Cre, *Tab1<sup>KO</sup>Tab2<sup>Het</sup>*, *Tab1<sup>Het</sup>Tab2<sup>KO</sup>*, and *Tab1Tab2<sup>DKO</sup>* keratinocytes were stimulated with 0.5 M NaCl for 5 or 15 min. Immunoblotting was performed using the indicated antibodies. Asterisk indicates a nonspecific band.

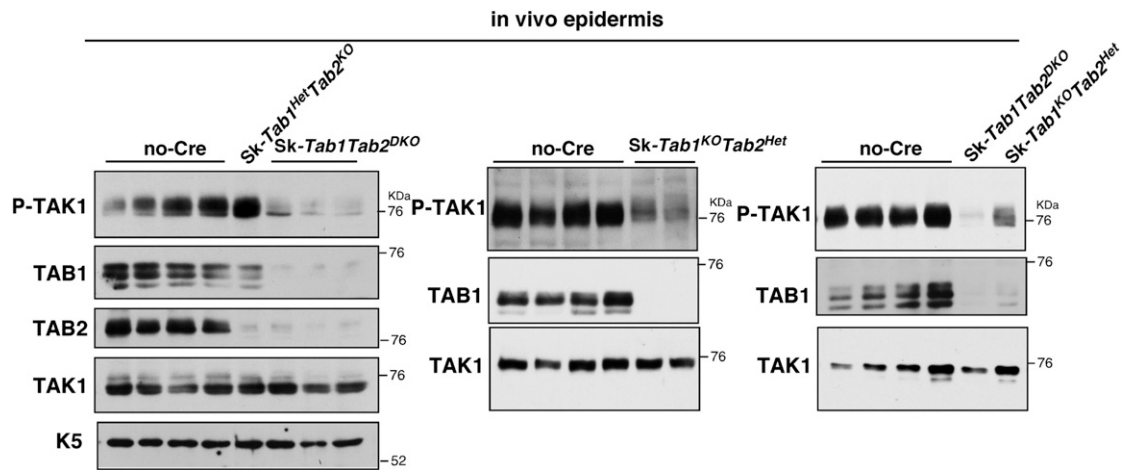

**Fig. S4.** Basal activity of TAK1 in vivo epidermis. Shown is immunoblotting of phosphorylated TAK1, total TAK1, TAB1, and TAB2 in epidermal extracts of no-Cre control, *Sk-Tab1<sup>Het</sup>Tab2<sup>KO</sup>*, *Sk-Tab1<sup>KO</sup>Tab2<sup>Het</sup>*, and *Sk-Tab1Tab2<sup>DKO</sup>* mice from three litters. Each set of panels represents one litter and each lane represents one animal.

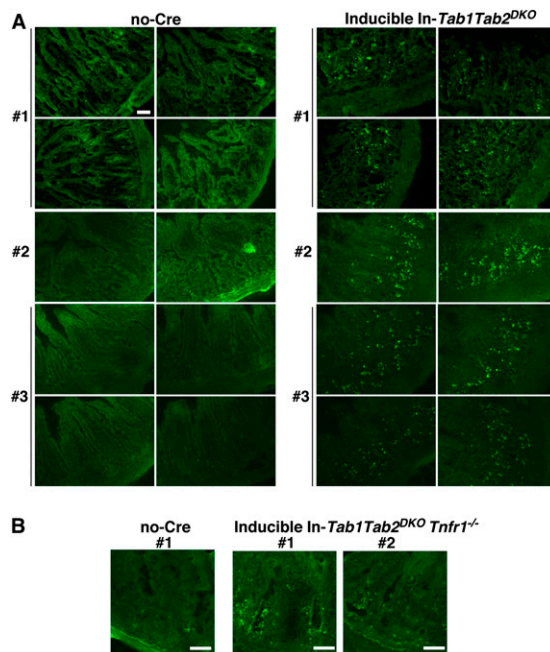

**Fig. S5.** Double deficiency of *Tab1* and *Tab2* causes ROS accumulation. (A) ROS were detected in unfixed fresh frozen intestine sections by CM-H2DCFDA. Images of two different positions of the small intestine from three no-Cre control and three inducible double-knockout mice (nos. 1, 2, and 3) are shown. (Scale bars, 50  $\mu$ m.) (B) Control no-Cre and two (nos. 1 and 2) inducible *In-Tab1Tab2<sup>DKO</sup> Tnfr1<sup>-/-</sup>* mice were treated with tamoxifen for 3 consecutive days, and intestinal sections were prepared 2 wk after the tamoxifen treatment. ROS were detected in unfixed fresh frozen intestine sections by CM-H2DCFDA. (Scale bars, 40  $\mu$ m.)

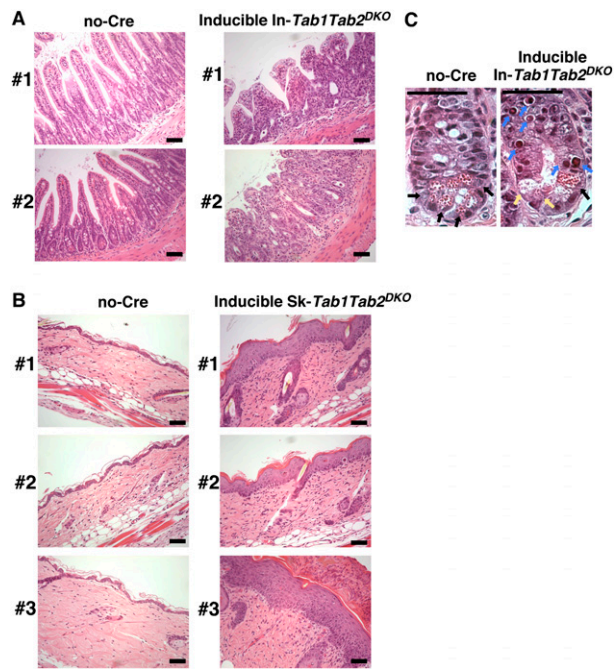

**Fig. 56.** Double deficiency of *Tab1* and *Tab2* causes tissue damage. (A) Control no-Cre and inducible In-*Tab1Tab2*<sup>DKO</sup> mice or *Sk-Tab1Tab2*<sup>DKO</sup> mice were treated with tamoxifen for 2 or 5 consecutive days, respectively. Intestinal sections were prepared 2 d after the second tamoxifen treatment and skin sections were prepared 9 d after the fifth tamoxifen treatment. Images of the small intestine and the epidermis from two or three no-Cre control and two or three inducible double-knockout mice (nos. 1 and 2 or nos. 1, 2, and 3) are shown. (Scale bars, 50  $\mu\text{m}$ .) (B) The crypts of control no-Cre and inducible In-*Tab1Tab2*<sup>DKO</sup> are shown. Black arrows indicate intact paneth cells, yellow arrows indicate damaged paneth cells, and blue arrows indicate morphologically apoptotic epithelial cells. (Scale bars, 40  $\mu\text{m}$ .)
